# Supplementary material for: A lesion and connectivity-based hierarchical model of chronic aphasia recovery dissociates patients and healthy controls
Source: PubMed Central journal article supplement — Neuroimage Clin. 2019 Jul 2;23:101919. doi: 10.1016/j.nicl.2019.101919 (PMC6702239; doi:10.1016/j.nicl.2019.101919), 2019-07-02
Supplement: mmc1.pdf [file mmc1.pdf]

## Supplementary Material

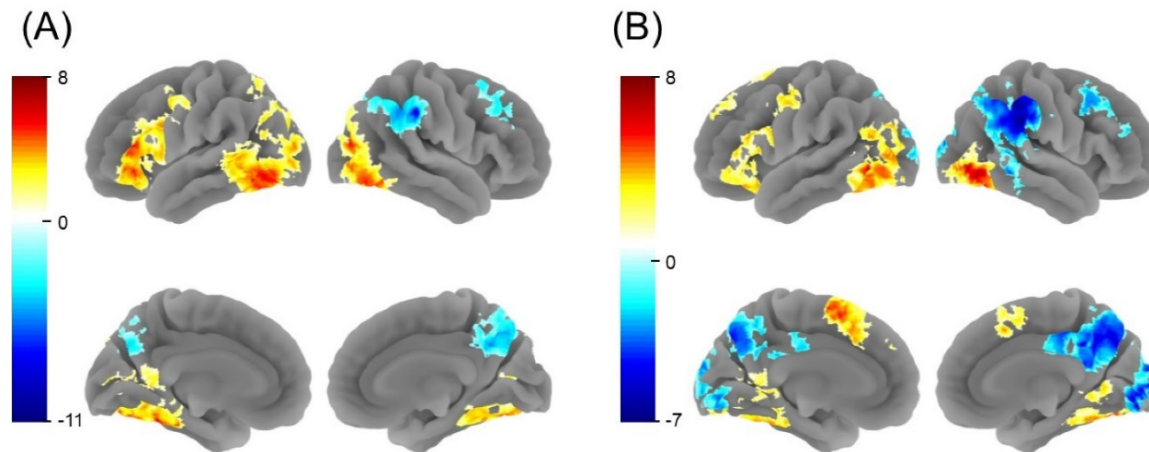

Figure S1. Whole brain activation from permutation tests with 10,000 simulations at a cluster-defining uncorrected threshold ( $p < 0.01$ ) and F.W.E. cluster-corrected threshold ( $p < 0.05$ ), for (A) controls ( $k_{\text{crit}}$  cluster extent = 263 voxels) and (B) patients ( $k_{\text{crit}}$  cluster extent = 274 voxels).

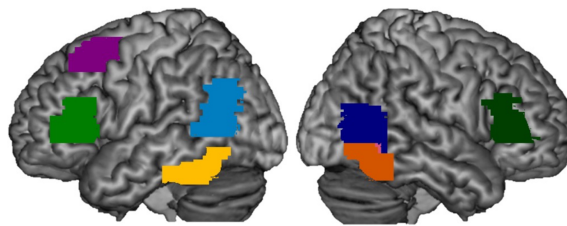

Figure S2. ROI masks created to localize individual activation peaks.

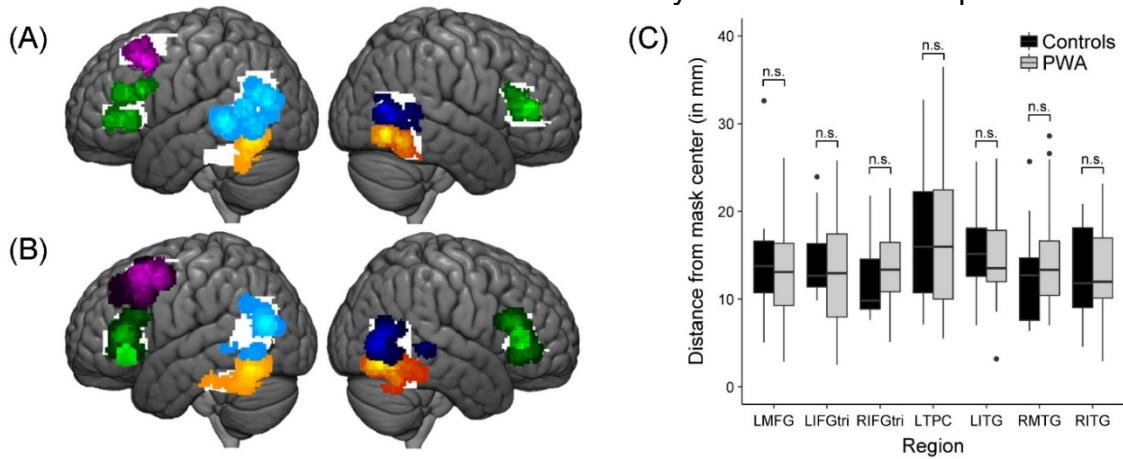

Figure S3. Overlays and distance calculations for volumes of interest (VOIs). The overlays of individual VOIs in each region in the (A) controls and (B) patient groups reveal that peaks were extracted from similar anatomical locations. (C) Results of the t-tests between patients and controls indicate that the distance between individual peaks and the center of each ROI mask did not differ between groups (n.s. = not significant). Regional masks shown in white.

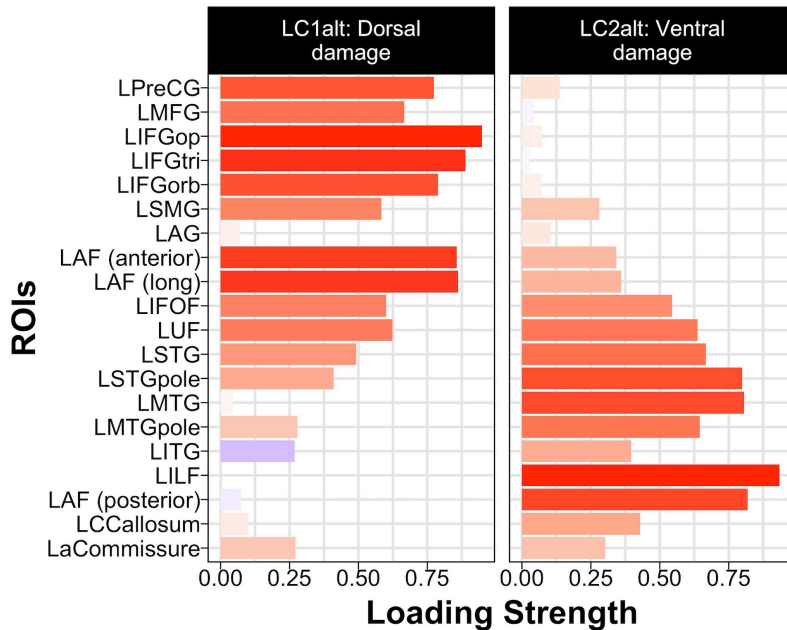

Figure S4. Variable loadings of percent damage to regions of interest (ROIs) onto alternative lesion components (LCs). Positive and negative loadings are shaded in red and blue, respectively.

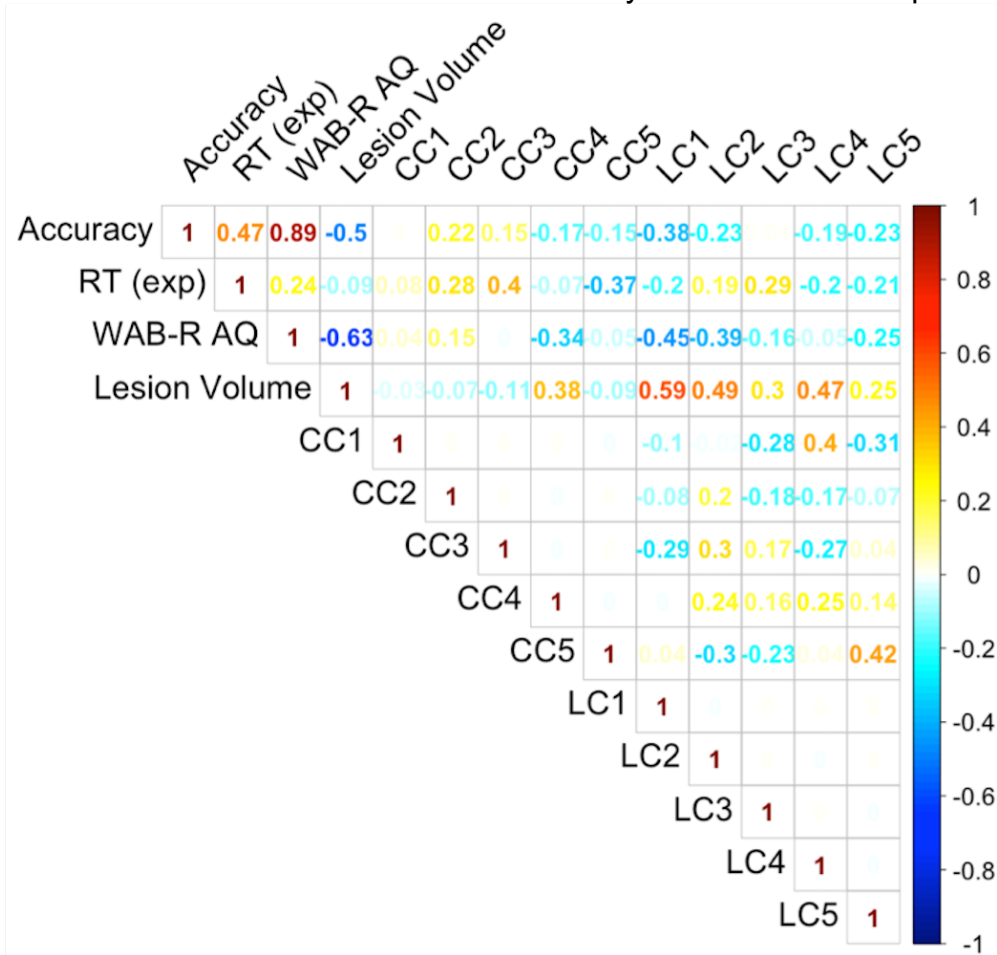

Figure S5. Relationship between DCM connectivity components (CCs), lesion components (LCs), total lesion volume, and language measures (fMRI task accuracy, fMRI task exponentiated reaction time [RT exp] and WAB-R Aphasia Quotient [AQ]). Pearson correlation coefficients are provided within each cell.

Table S1. Summary of backward stepwise regressions predicting five DCM connection components from alternative lesion components (see Figure S4) and total lesion volume

| DCM Variable                         | Overall model |           |            | $R^2$ | Lesion Predictors                                                                                                               | $p$ -value                           |
|--------------------------------------|---------------|-----------|------------|-------|---------------------------------------------------------------------------------------------------------------------------------|--------------------------------------|
|                                      | (df)          | $F$ -stat | $p$ -value |       |                                                                                                                                 |                                      |
| CC1: RH connectivity                 | (3,26)        | 1.27      | 0.306      | 0.128 | LC1alt: $\beta = -0.622$ , $t = -1.679$<br>LC2alt: $\beta = -0.625$ , $t = -1.893$<br>Vol.: $\beta = 9.828^{-06}$ , $t = 1.692$ | 0.105<br>0.070 <sup>^</sup><br>0.103 |
| CC2: Target bilateral frontal ROIs   | --            | --        | --         | --    | --                                                                                                                              | --                                   |
| CC3: IntraLH, target frontal ROIs    | (2,27)        | 4.23      | 0.025*     | 0.239 | LC2alt: $\beta = 0.591$ , $t = 2.829$<br>Vol.: $\beta = -5.880^{-06}$ , $t = -2.231$                                            | 0.009**<br>0.034*                    |
| CC4: IntraLH, target LITG            | (2,27)        | 3.66      | 0.039*     | 0.213 | LC1alt: $\beta = -0.368$ , $t = -1.545$<br>Vol.: $\beta = 8.019^{-06}$ , $t = 2.669$                                            | 0.134<br>0.013*                      |
| CC5: Target bilateral posterior ROIs | (2,27)        | 1.71      | 0.200      | 0.113 | LC1alt: $\beta = 0.450$ , $t = 1.777$<br>Vol.: $\beta = -5.136^{-06}$ , $t = -1.610$                                            | 0.087<br>0.119                       |

Notes: Dashes indicate intercept-only model for CC2 predicted by lesion variables. CC = connectivity component, LC = lesion component, RH = Right hemisphere, ROIs = regions of interest, IntraLH = left intrahemispheric connections, Vol. = total lesion volume, alt = alternative components from retention of only two lesion PCs. Variance inflation factors (VIFs) for all models were < 3.0. Significance for  $p$ -values: <sup>^</sup> 0.08 <> 0.05, \* < 0.05, \*\* < 0.01, \*\*\* < 0.001

Table S2. Summary of backward stepwise regressions predicting language abilities from DCM connection and alternative lesion components (see Figure S4)

| Variable                    | Overall model |           |            | DCM & Lesion Predictors | $p$ -value                                                                                                       |                                        |
|-----------------------------|---------------|-----------|------------|-------------------------|------------------------------------------------------------------------------------------------------------------|----------------------------------------|
|                             | (df)          | $F$ -stat | $p$ -value |                         |                                                                                                                  |                                        |
| fMRI task %acc              | (2,27)        | 5.09      | 0.013*     | 0.274                   | LC1alt: $\beta = -0.069$ , $t = -2.625$<br>LC2alt: $\beta = -0.048$ , $t = -1.814$                               | 0.014*<br>0.081                        |
| fMRI task RT <sup>exp</sup> | (3,26)        | 5.17      | 0.006**    | 0.374                   | CC2: $\beta = 0.660$ , $t = 1.829$<br>CC3: $\beta = 0.930$ , $t = 2.576$<br>CC5: $\beta = -0.850$ , $t = -2.354$ | 0.079 <sup>^</sup><br>0.016*<br>0.026* |
| WAB-R AQ                    | (2,27)        | 10.34     | <0.001***  | 0.434                   | LC1alt: $\beta = -10.994$ , $t = -3.200$<br>LC2alt: $\beta = -11.100$ , $t = -3.231$                             | 0.004**<br>0.003**                     |

Notes: %acc = percent accuracy on the fMRI task, RT<sup>exp</sup> = fMRI task RT in milliseconds, exponentiated (exp) to improve distribution of the residuals. CC = connectivity component, LC = lesion component, alt = alternative components from retention of only two lesion PCs. Variance inflation factors (VIFs) for all models were < 3.0. Significance for  $p$ -values: <sup>^</sup> 0.08 <> 0.05, \* < 0.05, \*\* < 0.01, \*\*\* < 0.001

Table S3. Spearman correlations between DCM components and noisy volumes of interest (VOIs)

| DCM Variable                         | Noisy LMFG               | Noisy LIFGtri                         | Noisy LTFC                           | Noisy RIFGtri            |
|--------------------------------------|--------------------------|---------------------------------------|--------------------------------------|--------------------------|
| CC1: RH connectivity                 | r = 0.071,<br>p = 0.711  | r = -0.105,<br>p = 0.582              | r = 0.252,<br>p = 0.178              | r = -0.014,<br>p = 0.943 |
| CC2: Target bilateral frontal ROIs   | r = 0.160,<br>p = 0.397  | r = -0.035,<br>p = 0.855              | r = 0.192,<br>p = 0.311              | r = -0.032,<br>p = 0.867 |
| CC3: IntraLH, target frontal ROIs    | r = -0.071,<br>p = 0.711 | r = -0.357,<br>p = 0.053 <sup>^</sup> | r = 0.348,<br>p = 0.059 <sup>^</sup> | r = -0.196,<br>p = 0.300 |
| CC4: IntraLH, target LITG            | r = 0.455,<br>p = 0.011* | r = -0.070,<br>p = 0.715              | r = 0.078,<br>p = 0.681              | r = -0.260,<br>p = 0.166 |
| CC5: Target bilateral posterior ROIs | r = -0.096,<br>p = 0.613 | r = 0.044,<br>p = 0.819               | r = -0.575,<br>p < 0.001***          | r = -0.205,<br>p = 0.278 |

Notes: CC = connectivity component, RH = Right hemisphere, ROIs = regions of interest, IntraLH = left intrahemispheric connections. Correction for multiple tests not applied.

Significance for p-values: <sup>^</sup> 0.08 <> 0.05, \* < 0.05, \*\* < 0.01, \*\*\* < 0.001

Table S4. Summary of regression models predicting DCM connection components from lesion variables, controlling for noisy volumes of interest (VOIs)

| DCM Variable                         | Overall model  |         |                | Lesion Predictors                                                                                                                                                                                  | p-value                                   |
|--------------------------------------|----------------|---------|----------------|----------------------------------------------------------------------------------------------------------------------------------------------------------------------------------------------------|-------------------------------------------|
|                                      | (df)<br>F-stat | p-value | R <sup>2</sup> |                                                                                                                                                                                                    |                                           |
| CC1: RH connectivity                 | --             | --      | --             | --                                                                                                                                                                                                 | --                                        |
| CC2: Target bilateral frontal ROIs   | --             | --      | --             | --                                                                                                                                                                                                 | --                                        |
| CC3: IntraLH, target frontal ROIs    | --             | --      | --             | --                                                                                                                                                                                                 | --                                        |
| CC4: IntraLH, target LITG            | (3,26)<br>3.26 | 0.037*  | 0.274          | LC1: $\beta = -0.365$ , t = -1.759<br>Vol.: $\beta = 6.636^{-06}$ , t = 2.475<br>Noisy LMFG = $\beta = 0.379$ , t = 1.321                                                                          | 0.090<br>0.020*<br>0.198                  |
| CC5: Target bilateral posterior ROIs | (5,24)<br>3.54 | 0.015*  | 0.424          | LC1: $\beta = 0.147$ , t = 0.537<br>LC4: $\beta = 0.142$ , t = 0.614<br>LC5: $\beta = 0.313$ , t = 1.362<br>Vol.: $\beta = -3.474^{-06}$ , t = -0.808<br>Noisy LTFC: $\beta = -0.461$ , t = -1.794 | 0.596<br>0.545<br>0.186<br>0.427<br>0.086 |

Notes: CC = connectivity component, LC = lesion component, RH = Right hemisphere, ROIs = regions of interest, IntraLH = left intrahemispheric connections, Vol. = total lesion volume.

Dashes indicate that the DCM connectivity component was not significantly related to the presence of noisy VOIs and thus, the regression model was not re-run. Variance inflation factors (VIFs) for all models were < 3.0. Significance for p-values: <sup>^</sup> 0.08 <> 0.05, \* < 0.05, \*\* < 0.01, \*\*\* < 0.001
